# Supplementary material for: Vitrification of the smectic CA* phase and kinetics of cold crystallization investigated for a fluorinated compound with a chiral centre based on (S)-(+)-3-octanol
Source: Royal Society of Chemistry journal article supplement (doi:10.1039/d3cp01255g), 2023-01-01
Supplement: d3cp01255g1.pdf [file d3cp01255g1.pdf]

## Vitrification of the smectic $C_A^*$ phase and kinetics of cold crystallization investigated for the fluorinated compound with a chiral centre based on (*S*)-(+)-3-octanol

Aleksandra Deptuch<sup>1,\*</sup>, Artur Lelito<sup>2</sup>, Ewa Juszyńska-Gałazka<sup>1,3</sup>, Małgorzata Jasiurkowska-Delaporte<sup>1</sup>, Magdalena Urbańska<sup>4</sup>

<sup>1</sup> Institute of Nuclear Physics Polish Academy of Sciences, PL-31342 Kraków, Poland

<sup>2</sup> Faculty of Materials Engineering and Physics, Cracow University of Technology, PL-30084 Kraków, Poland

<sup>3</sup> Research Center for Thermal and Entropic Science, Graduate School of Science, Osaka University, 560-0043 Osaka, Japan

<sup>4</sup> Institute of Chemistry, Military University of Technology, PL-00908 Warsaw, Poland

\* [aleksandra.deptuch@ifj.edu.pl](mailto:aleksandra.deptuch@ifj.edu.pl)

### Supporting Information

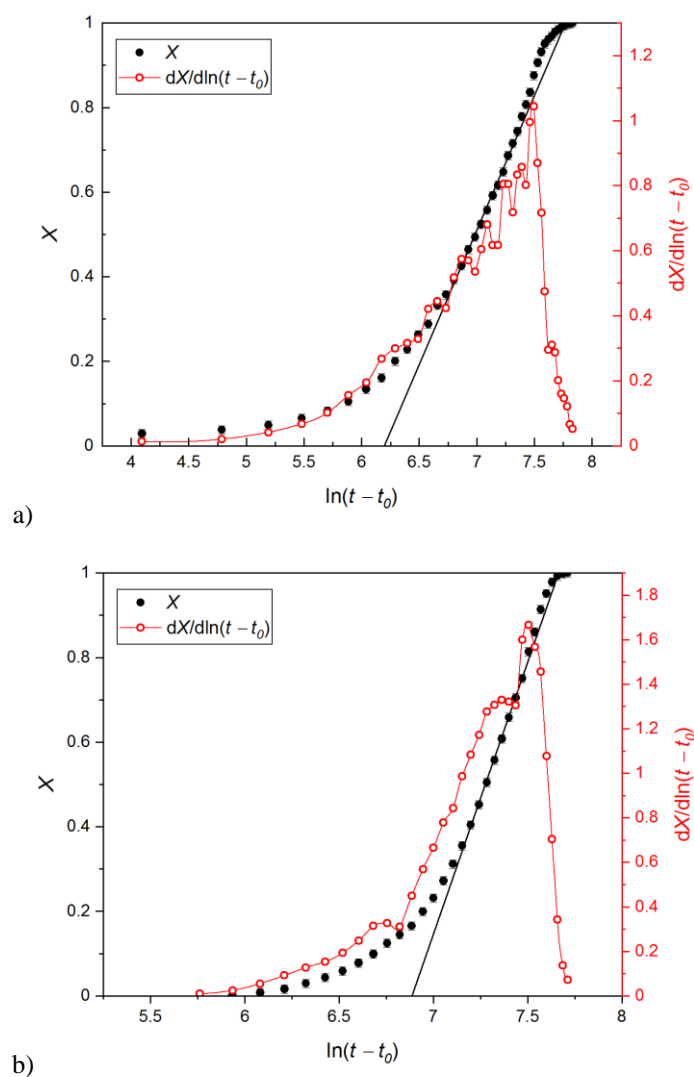

Figure S1. Avrami plots for the isothermal melt crystallization of II.5.(HH) (S) in 278 K (a) and 283 K (b).

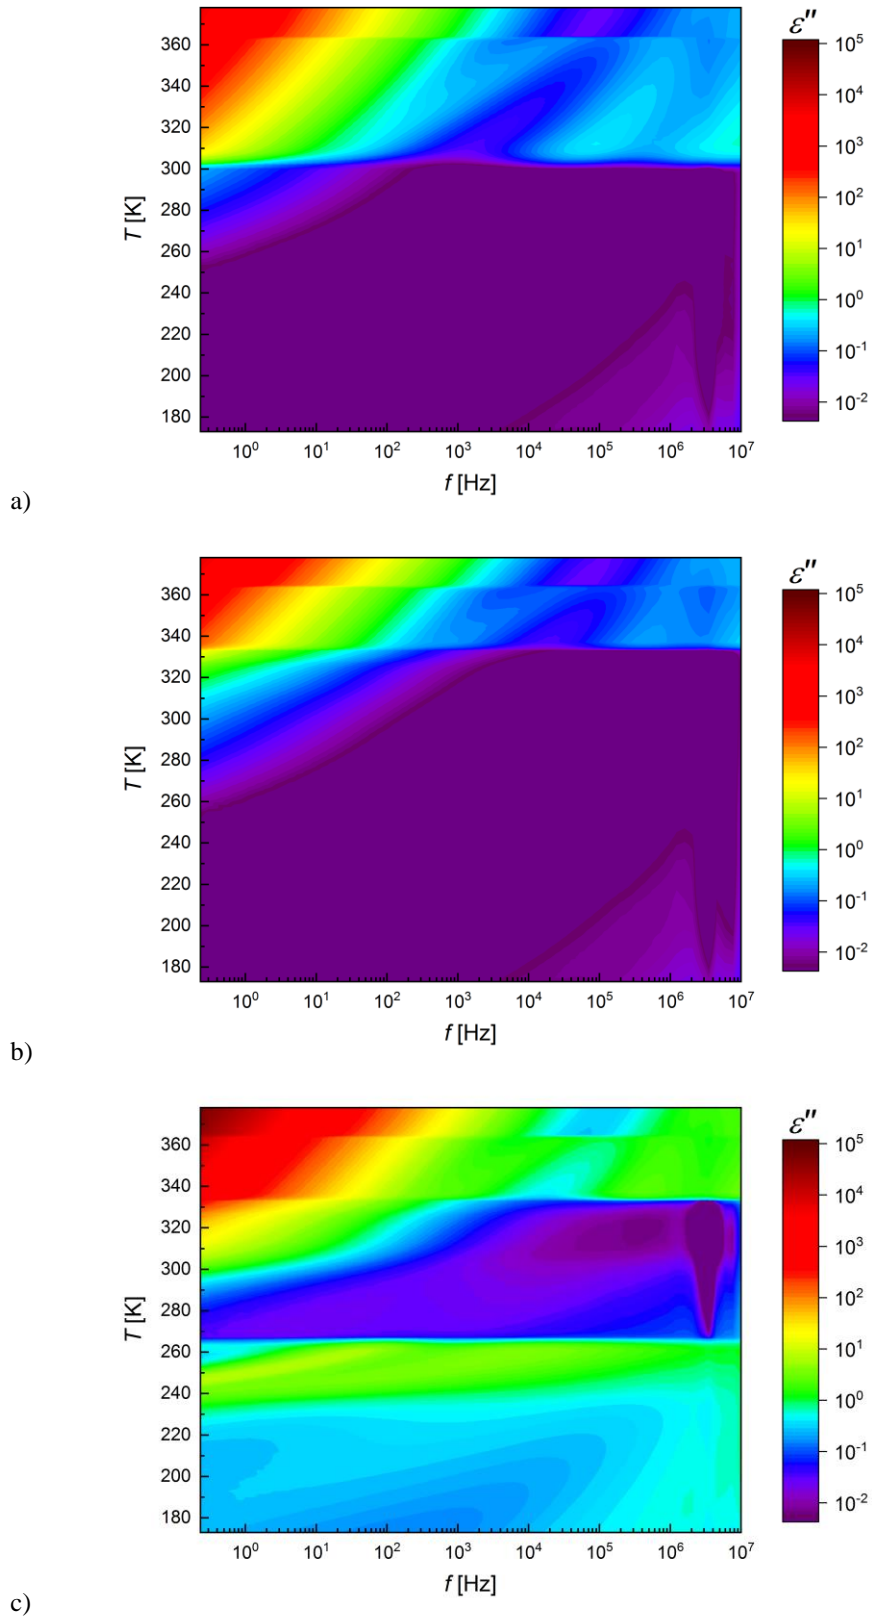

Figure S2. Dielectric absorption of II.5.(HH) (S) vs. temperature and frequency on slow cooling (a), on heating after slow cooling (b) and on heating after fast cooling (c).

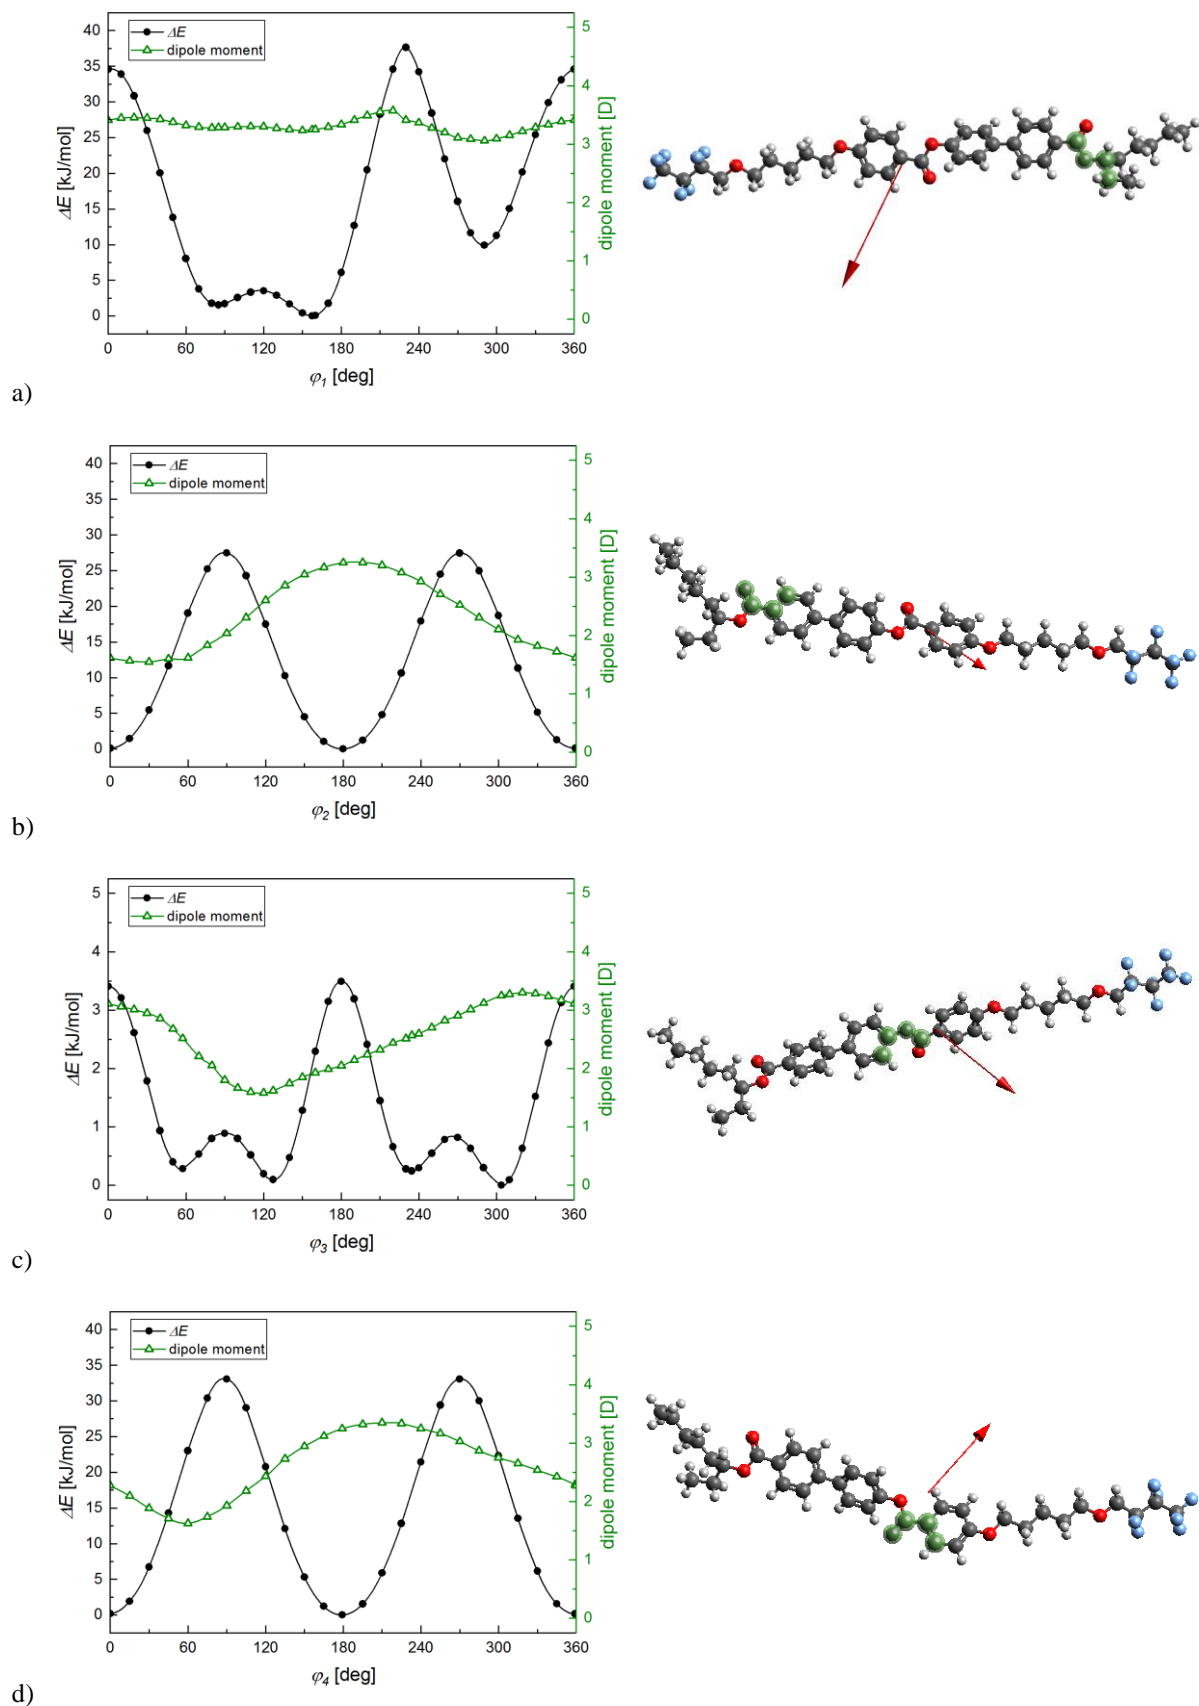

Figure S3 (part I). Conformational energy (circles, left axis) and total dipole moment (squares, right axis) vs. torsional angle for selected intra-molecular rotations calculated for the isolated II.5.(HH) (S) molecule with the DFT-B3LYP/def2TZVP method.

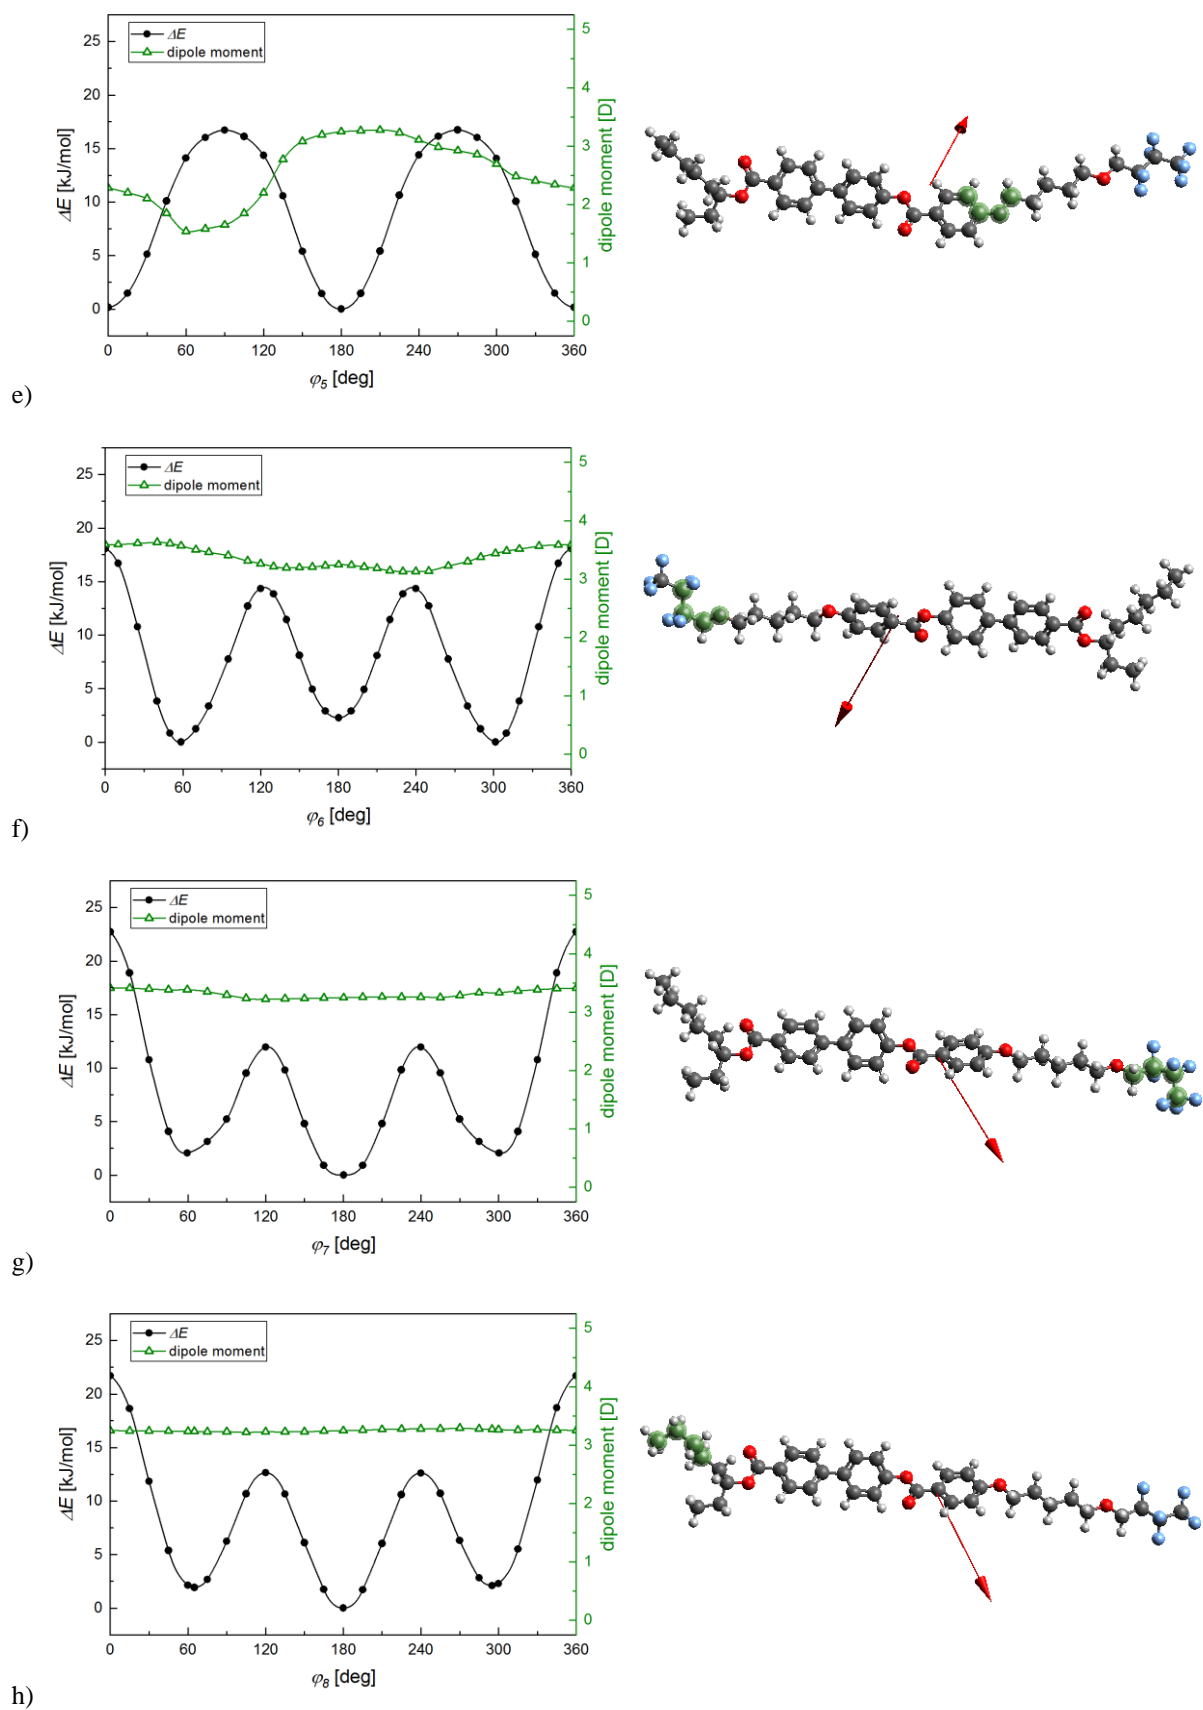

Figure S3 (part II). Conformational energy (circles, left axis) and total dipole moment (squares, right axis) vs. torsional angle for selected intra-molecular rotations calculated for the isolated II.5.(HH) (S) molecule with the DFT-B3LYP/def2TZVP method.

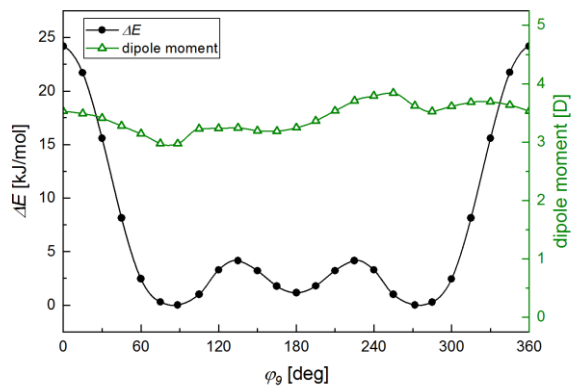

i)

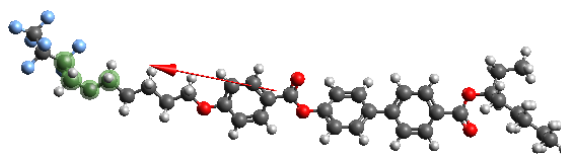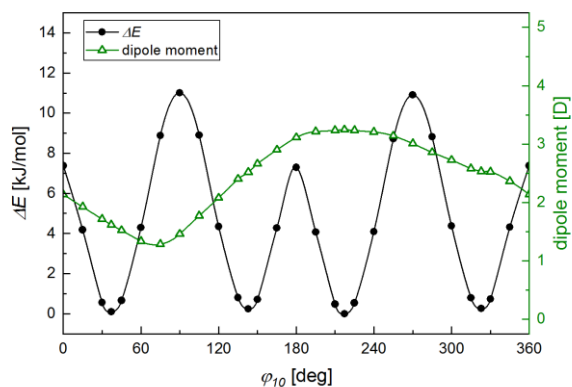

j)

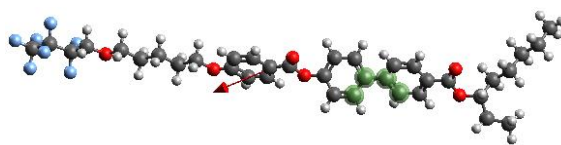

Figure S3 (part III). Conformational energy (circles, left axis) and total dipole moment (squares, right axis) vs. torsional angle for selected intra-molecular rotations calculated for the isolated II.5.(HH) (S) molecule with the DFT-B3LYP/def2TZVP method.
